# Supplementary material for: Prognostic Value of Routinely Measured Inflammatory Biomarkers in Older Cancer Patients: Pooled Analysis of Three Cohorts
Source: MDPI journal article supplement (doi:10.3390/cancers13246154), 2021-12-07
Supplement: s1 [file s1]

*Supplementary*

**Prognostic value of routinely measured inflammatory biomarkers in older cancer patients: pooled analysis of three cohorts.**

## Supplementary Methods

The risk of frailty was assessed using the G8 score, which comprises eight items [24]: food intake (A), weight loss (B), mobility/motor skills (C), neuropsychological problems (D), body mass index (BMI) (E), number of medications (F), self-perception of health (G), and age (H). Items A, C, D, G and H were graded as 0 (least favorable state), 1, or 2 (most favorable state); items B and E were graded as 0, 1, 2, or 3 (where 3 is the most favorable state), and item F was graded as either 0 or 1 (where 1 is the most favorable state). The total G8 score ranges from 0 to 17, and a score of 14 or less corresponds to a risk of frailty (i.e. a requirement for geriatric assessment).

The modified G8 was also recorded; it contains six items [25]: weight loss, graded as 10, 2 and 0 (most favorable state), neuropsychological status, graded as 3 or 0 (most favorable state), number of medications, graded as 2 or 0 (most favorable state), self-perception of health, graded as 3 or 0 (most favorable state), performance status, graded as 12, 4 or 0 (most favorable state), and a history of heart failure or coronary artery disease, graded as 5 or 0 (most favorable state). The total modified G8 score ranges from 0 to 35, and a score of 6 or more corresponds to a risk of frailty.

## References

- [27] Bellera, C.A.; Rainfray, M.; Mathoulin-Pelissier, S.; Mertens, C.; Delva, F.; Fonck, M.; Soubeyran, P.L. Screening older cancer patients: first evaluation of the G-8 geriatric screening tool. *Annals of oncology : official journal of the European Society for Medical Oncology* 2012, 23, 2166-2172, doi:10.1093/annonc/mdr587.
- [28] Martinez-Tapia, C.; Canoui-Poitaine, F.; Bastuji-Garin, S.; Soubeyran, P.; Mathoulin-Pelissier, S.; Tournigand, C.; Paillaud, E.; Laurent, M.; Audureau, E. Optimizing the G8 Screening Tool for Older Patients With Cancer: Diagnostic Performance and Validation of a Six-Item Version. *The oncologist* 2016, 21, 188-195, doi:10.1634/theoncologist.2015-0326.

**Table S1: Multivariable analysis of GPS, mGPS, CRP, albumin and the CRP/albumin ratio with regard to one-year mortality (n=1604 for all models)**

| Models                                               | Adjusted hazard ratio<br>[95%CI] | P      |
|------------------------------------------------------|----------------------------------|--------|
| <i>G8 score</i>                                      |                                  |        |
| Normal                                               | 1                                |        |
| Abnormal                                             | 2.90 [1.46; 5.78]                | 0.002  |
| <i>GPS</i>                                           |                                  |        |
| GPS 0                                                | 1                                |        |
| GPS 1                                                | 4.48 [2.03; 9.89]                | <0.001 |
| GPS 2                                                | 11.64 [4.54; 29.81]              | <0.001 |
| <i>Abnormal G8 score*GPS 1</i>                       | 0.55 [0.24; 1.27]                | 0.16   |
| <i>Abnormal G8 score*GPS 2</i>                       | 0.34 [0.13; 0.91]                | 0.03   |
| <i>G8 score</i>                                      |                                  |        |
| Normal                                               | 1                                |        |
| Abnormal                                             | 2.61 [1.48; 4.60]                | 0.001  |
| <i>mGPS</i>                                          |                                  |        |
| mGPS 0                                               | 1                                |        |
| mGPS 1                                               | 2.81 [1.31; 6.03]                | 0.008  |
| mGPS 2                                               | 8.14 [3.41; 19.41]               | <0.001 |
| <i>Abnormal G8 score*mGPS 1</i>                      | 0.63 [0.28; 1.43]                | 0.27   |
| <i>Abnormal G8 score*mGPS 2</i>                      | 0.35 [0.14; 0.87]                | 0.02   |
| <i>G8 score</i>                                      |                                  |        |
| Normal                                               | 1                                |        |
| Abnormal                                             | 2.55 [1.44; 4.50]                | 0.001  |
| <i>CRP</i>                                           |                                  |        |
| CRP ≤10 mg/L                                         | 1                                |        |
| CRP >10 mg/L                                         | 3.73 [1.89; 7.37]                | <0.001 |
| <i>Abnormal G8 score*CRP &gt;10 mg/L</i>             | 0.65 [0.32; 1.33]                | 0.24   |
| <i>G8 score</i>                                      |                                  |        |
| Normal                                               | 1                                |        |
| Abnormal                                             | 2.25 [1.42; 3.58]                | 0.001  |
| <i>Albumin</i>                                       |                                  |        |
| Albumin ≥35 g/L                                      | 1                                |        |
| Albumin <35 g/L                                      | 4.72 [2.37; 9.37]                | <0.001 |
| <i>Abnormal G8 score*Albumin &lt;35 g/L</i>          | 0.49 [0.24; 0.99]                | 0.049  |
| <i>G8 score</i>                                      |                                  |        |
| Normal                                               | 1                                |        |
| Abnormal                                             | 3.94 [1.86; 8.32]                | <0.001 |
| <i>CRP/albumin ratio</i>                             |                                  |        |
| CRP/albumin ratio ≤0.215                             | 1                                |        |
| CRP/albumin ratio >0.215                             | 7.15 [3.22; 15.90]               | <0.001 |
| <i>Abnormal G8 score*CRP/albumin ratio &gt;0.215</i> | 0.39 [0.17; 0.90]                | 0.03   |

Hazard ratios and p-values correspond to multivariable analysis models adjusted for age, sex, tumor site, metastatic status, ECOG-PS, and G8 frailty screening score, with a term for the interaction between G8 and the biomarker (one model per biomarker, with each biomarker added singly to the baseline clinical model). Results are interpreted as follows: for example for GPS, Abnormal G8 score\*GPS 1 and Abnormal G8 score\*GPS 2 correspond to the interactions terms; HR for G8 score and for GPS correspond to stratum-specific HR, i.e. the HR for G8 score corresponds to the HR of the association between abnormal G8 score and one-year mortality in the stratum where GPS=0 (reference value of the variable

GPS); the HR for GPS1 and GPS2 correspond respectively to the association between GPS1 and one-year mortality and the association between GPS2 and one-year mortality in the stratum of patients with a normal G8 score (reference value of the variable G8 score). And for example, to get the HR of the association between GPS2 and one-year mortality in the stratum of patients with an abnormal G8 score, we multiply the HR of the association between GPS2 and one-year mortality in the stratum of patients with a normal G8 score (i.e. 11.64) by the interaction term Abnormal G8 score\*GPS 2 (i.e. 0.34), which gives an HR of 3.97 as presented in Figure 2.

GPS: Glasgow Prognostic Score; mGPS: modified Glasgow Prognostic Score; CRP: C-reactive protein; CI: confidence interval.

**Table S2: Multivariable analysis of GPS, mGPS, CRP, albumin and the CRP/albumin ratio with regard to one-year mortality: a sensitivity analysis with the modified G8 score (n=1334 for all models)**

| Models                            | Adjusted hazard ratio<br>[95%CI] | P      |
|-----------------------------------|----------------------------------|--------|
| <i>Normal modified G8 score</i>   |                                  |        |
| GPS 0                             | 1                                |        |
| GPS 1                             | 3.98 [1.48; 10.73]               | 0.006  |
| GPS 2                             | 7.42 [1.94; 28.39]               | 0.003  |
| <i>Abnormal modified G8 score</i> |                                  |        |
| GPS 0                             | 1                                |        |
| GPS 1                             | 2.68 [1.87; 3.83]                | <0.001 |
| GPS 2                             | 4.26 [3.00; 6.06]                | <0.001 |
| <i>Normal modified G8 score</i>   |                                  |        |
| mGPS 0                            | 1                                |        |
| mGPS 1                            | 4.33 [1.59; 11.80]               | 0.004  |
| mGPS 2                            | 6.60 [1.76; 24.75]               | 0.005  |
| <i>Abnormal modified G8 score</i> |                                  |        |
| mGPS 0                            | 1                                |        |
| mGPS 1                            | 1.77 [1.25; 2.49]                | 0.001  |
| mGPS 2                            | 2.86 [2.15; 3.80]                | <0.001 |
| <i>Normal modified G8 score</i>   |                                  |        |
| CRP ≤10 mg/L                      | 1                                |        |
| CRP >10 mg/L                      | 4.65 [1.86; 11.61]               | 0.001  |
| <i>Abnormal modified G8 score</i> |                                  |        |
| CRP ≤10 mg/L                      | 1                                |        |
| CRP >10 mg/L                      | 2.41 [1.85; 3.14]                | <0.001 |
| <i>Normal modified G8 score</i>   |                                  |        |
| Albumin ≥35 g/L                   | 1                                |        |
| Albumin <35 g/L                   | 2.62 [0.86; 7.94]                | 0.09   |
| <i>Abnormal modified G8 score</i> |                                  |        |
| Albumin ≥35 g/L                   | 1                                |        |
| Albumin <35 g/L                   | 2.41 [1.87; 3.11]                | <0.001 |
| <i>Normal modified G8 score</i>   |                                  |        |
| CRP/albumin ratio ≤0.215          | 1                                |        |
| CRP/albumin ratio >0.215          | 7.78 [2.93; 20.67]               | <0.001 |
| <i>Abnormal modified G8 score</i> |                                  |        |
| CRP/albumin ratio ≤0.215          | 1                                |        |
| CRP/albumin ratio >0.215          | 2.98 [2.20; 4.03]                | <0.001 |

Hazard ratios and p-values correspond to multivariable analysis models adjusted for age, sex, tumor site, metastatic status, ECOG-PS, and G8 frailty screening score, with a term for the interaction between G8 and the biomarker (one model per biomarker, with each biomarker added singly to the baseline clinical model).

GPS: Glasgow Prognostic Score; mGPS: modified Glasgow Prognostic Score; CRP: C-reactive protein; CI: confidence interval.

**Table S3: Discriminant power of models with GPS, mGPS, CRP, albumin and CRP/albumin ratio: a sensitivity analysis with the modified G8 screening score (n=1334)**

| Model                                                                         | Harrell's C [95%CI] | NRI+ [95%CI]       | NRI- [95%CI]       |
|-------------------------------------------------------------------------------|---------------------|--------------------|--------------------|
| Baseline model: age, sex, tumor site, metastatic status, ECOG-PS, modified G8 | 0.83 [0.82; 0.85]   | -                  | -                  |
| Baseline model + <b>GPS</b>                                                   | 0.85 [0.84; 0.87]   | 0.07 [0.01; 0.13]  | 0.03 [-0.01; 0.10] |
| Baseline model + <b>mGPS</b>                                                  | 0.85 [0.83; 0.87]   | 0.02 [-0.04; 0.11] | 0.03 [-0.02; 0.10] |
| Baseline model + <b>CRP</b>                                                   | 0.85 [0.83; 0.86]   | 0.05 [-0.04; 0.13] | 0.01 [-0.03; 0.09] |
| Baseline model + <b>albumin</b>                                               | 0.84 [0.83; 0.86]   | 0.03 [-0.04; 0.12] | 0.04 [-0.03; 0.09] |
| Baseline model + <b>CRP/albumin ratio</b>                                     | 0.85 [0.83; 0.87]   | 0.08 [0.02; 0.16]  | 0.02 [-0.03; 0.08] |

ECOG-PS: Eastern Cooperative Oncology Group-Performance Status; CRP: C-reactive protein; GPS: Glasgow Prognostic Score; mGPS: modified Glasgow Prognostic Score; NRI: net reclassification improvement; CI: confidence interval.

**Table S4: Multivariable analysis of GPS, mGPS, CRP, albumin and CRP/albumin ratio with regard to one-year mortality in the subgroup of patients with metastatic cancer (n=666)**

| Models                   | Adjusted Hazard Ratio<br>[95%CI] | P      |
|--------------------------|----------------------------------|--------|
| <i>Normal G8 score</i>   |                                  |        |
| GPS 0                    | 1                                |        |
| GPS 1                    | 6.83 [1.83; 25.47]               | 0.004  |
| GPS 2                    | 23.16 [5.09; 105.42]             | <0.001 |
| <i>Abnormal G8 score</i> |                                  |        |
| GPS 0                    | 1                                |        |
| GPS 1                    | 1.98 [1.28; 3.07]                | 0.002  |
| GPS 2                    | 3.83 [2.56; 5.74]                | <0.001 |
| <i>Normal G8 score</i>   |                                  |        |
| mGPS 0                   | 1                                |        |
| mGPS 1                   | 3.60 [1.15; 11.33]               | 0.03   |
| mGPS 2                   | 12.61 [3.49; 45.56]              | <0.001 |
| <i>Abnormal G8 score</i> |                                  |        |
| mGPS 0                   | 1                                |        |
| mGPS 1                   | 1.58 [1.04; 2.40]                | 0.03   |
| mGPS 2                   | 3.08 [2.18; 4.33]                | <0.001 |
| <i>Normal G8 score</i>   |                                  |        |
| CRP ≤10 mg/L             | 1                                |        |
| CRP >10 mg/L             | 4.80 [1.72; 13.40]               | 0.003  |
| <i>Abnormal G8 score</i> |                                  |        |
| CRP ≤10 mg/L             | 1                                |        |
| CRP >10 mg/L             | 2.46 [1.78; 3.41]                | <0.001 |
| <i>Normal G8 score</i>   |                                  |        |
| Albumin ≥35 g/L          | 1                                |        |
| Albumin <35 g/L          | 5.37 [1.98; 14.56]               | 0.001  |
| <i>Abnormal G8 score</i> |                                  |        |
| Albumin ≥35 g/L          | 1                                |        |
| Albumin <35 g/L          | 2.45 [1.83; 3.28]                | <0.001 |
| <i>Normal G8 score</i>   |                                  |        |
| CRP/albumin ratio ≤0.215 | 1                                |        |
| CRP/albumin ratio >0.215 | 12.37 [2.79; 54.93]              | 0.001  |
| <i>Abnormal G8 score</i> |                                  |        |
| CRP/albumin ratio ≤0.215 | 1                                |        |
| CRP/albumin ratio >0.215 | 2.56 [1.78; 3.67]                | <0.001 |

Hazard ratios and p-values correspond to multivariable analysis models adjusted for age, sex, tumor site, metastatic status, ECOG-PS (Eastern Cooperative Oncology Group-Performance Status), G8 frailty screening score, with a term for the interaction between G8 and the biomarker (one model per biomarker, with each biomarker added singly to the baseline clinical model).

GPS: Glasgow Prognostic Score; mGPS: modified Glasgow Prognostic Score; CRP: C-reactive protein; CI: confidence interval.

**Table S5: Discriminant power of models with GPS, mGPS, CRP, albumin and CRP/albumin ratio with regard to one-year mortality in metastatic cancer subgroup (n=666)**

| Model                                                                | Harrell's C [95%CI] | NRI+ [95%CI]        | NRI- [95%CI]       |
|----------------------------------------------------------------------|---------------------|---------------------|--------------------|
| Baseline model: age, sex, tumor site, metastatic status, ECOG-PS, G8 | 0.78 [0.76; 0.81]   | -                   | -                  |
| Baseline model + <b>GPS</b>                                          | 0.81 [0.79; 0.83]   | 0.04 [-0.04; 0.13]  | 0.11 [-0.01; 0.22] |
| Baseline model + <b>mGPS</b>                                         | 0.81 [0.78; 0.83]   | -0.01 [-0.08; 0.09] | 0.18 [0.01; 0.23]  |
| Baseline model + <b>CRP</b>                                          | 0.80 [0.77; 0.82]   | 0.04 [-0.06; 0.13]  | 0.12 [-0.04; 0.20] |
| Baseline model + <b>albumin</b>                                      | 0.80 [0.77; 0.82]   | -0.01 [-0.09; 0.12] | 0.15 [-0.02; 0.22] |
| Baseline model + <b>CRP/albumin ratio</b>                            | 0.80 [0.77; 0.82]   | 0.10 [-0.03; 0.18]  | 0.06 [-0.06; 0.21] |

ECOG-PS: Eastern Cooperative Oncology Group-Performance Status; CRP: C-reactive protein; GPS: Glasgow Prognostic Score; mGPS: modified Glasgow Prognostic Score; NRI: net reclassification improvement; CI: confidence interval.
